# Supplementary material for: Hierarchical multistate models from population data: an application to parity statuses
Source: PeerJ. 2016 Sep 29;4:e2535. doi: 10.7717/peerj.2535 (PMC5047220; doi:10.7717/peerj.2535)
Supplement: Supplemental Information 1 [file peerj-04-2535-s001.xls]

## Sheet: Sheet1
Table with row headers in column A and column headers in rows 8 through 9
--------------------------------------------------------------------------------------------------
Table 1. Women by Number of Children Ever Born by Race, Hispanic Origin, Nativity Status, Marital Status, and Age: June 2004
(Numbers in thousands. For meaning of symbols, see table of contents.)
--------------------------------------------------------------------------------------------------
(leading dots indicate sub-parts)
(Column B is in persons, all others are percents)
Women by number of children ever born
	Total women	Total women	None	One	Two	Three	Four	Five and six	Seven or more
ALL RACES
All Marital Classes
15 to 44 years	61588	100	44.6	17.2	21.9	10.8	3.6	1.5	0.3
.15 to 19 years	9964	100	93.3	4.6	1.4	0.6	0	0	0
.20 to 24 years	10068	100	68.9	18.3	9.2	2.6	0.8	0.1	0.1
.25 to 29 years	9498	100	44.2	23.5	20.7	8.1	2.5	0.9	0.2
.30 to 34 years	10082	100	27.6	20.9	28.9	15.8	4.5	2.1	0.2
.35 to 39 years	10442	100	19.6	18.8	34.3	18.3	5.8	2.6	0.7
.40 to 44 years	11535	100	19.3	17.4	34.5	18.1	7.4	2.9	0.5
.Women Ever Married
.15 to 44 years	35203	100	19.2	22.1	33.8	16.9	5.6	2.1	0.4
..15 to 19 year	326	100	60.7	29.4	9.9	0	0	0	0
..20 to 24 year	2491	100	36.6	35.7	21.7	5	0.7	0	0.2
..25 to 29 year	5746	100	29.7	28.2	27.6	10.2	3.3	0.9	0.1
..30 to 34 year	7732	100	18.2	22.4	33.6	18.7	4.8	2	0.2
..35 to 39 year	8872	100	13.7	18.9	37.6	20.3	6.2	2.7	0.6
..40 to 44 year	10036	100	13.2	17.4	38	19.9	8.2	2.9	0.4
.Women Never Married
.15 to 44 years	26385	100	78.5	10.8	6.1	2.8	1.1	0.6	0.2
..15 to 19 year	9638	100	94.4	3.7	1.2	0.7	0	0	0
..20 to 24 year	7577	100	79.5	12.6	5.1	1.8	0.9	0.1	0
..25 to 29 year	3751	100	66.3	16.3	10.1	5	1.1	0.8	0.5
..30 to 34 year	2349	100	58.4	16.1	13.4	6.3	3.5	2.2	0.1
..35 to 39 year	1570	100	52.8	18.1	15.6	7	3.6	2	1
..40 to 44 year	1498	100	59.8	17	11.2	6.2	2.1	2.9	0.9
Footnotes:
- Represents zero or rounds to zero.
Source: U.S. Census Bureau, Current Population Survey, June 2004.
